# Supplementary material
Source: PubMed Central journal article supplement (PMC4528767)
Supplement: supp_pp.15.00731_PP2015-00731R1_Supplemental_Material.pdf [file supp_pp.15.00731_PP2015-00731R1_Supplemental_Material.pdf]

1 **Supplemental File S1**

2 *Derivation of expressions for flow area, pathlength corrections, grid areas, grid pathlengths and*  
3 *volume averaging basis adjustment*

4  
5 *To accompany "How does leaf anatomy influence water transport outside the xylem?" by TN*  
6 *Buckley et al.*

7 \_\_\_\_\_  
8 *Flow areas per unit bulk area,  $\gamma$*

9 For flow across membranes, the potential area for transport may be greater than the simple cross-  
10 sectional area, or bulk area. For example, the curved surfaces of mesophyll cells present a  
11 greater area of membrane for transport than the simple projected areas of those cells in the  
12 direction of flow. However, the effective area is also reduced in proportion to the connectivity of  
13 mesophyll cells (the fraction of total surface area that is in contact between adjacent cells;  $f_c$ ), and  
14 the complement of the tissue porosity ( $p_p$ ). The correction factors ( $\gamma$ ) are the ratios of actual  
15 contacting surface area to projected cross sectional area. For vertical transmembrane flow in  
16 palisade tissue, this is

17  
18 (S1)  $\gamma_{m,pv} = (1 - p_p) f_c \frac{\frac{1}{2} 4\pi r_p^2}{\pi r_p^2} = 2(1 - p_p) f_c$

19  
20 The numerator is one-half of the surface area of a sphere, which is also the surface area of the  
21 curved end of a capsule. The denominator is the projected cross-sectional area of the cell. An  
22 identical expression also arises for both vertical and horizontal transmembrane flow in spongy  
23 tissues:

24  
25 (S2)  $\gamma_{m,sv} = \gamma_{m,sh} = 2(1 - p_s) f_c$

26  
27 The surface area of a capsule is  $4 \cdot \pi r_p^2 + 2 \cdot \pi r_p (h_p - 2r_p)$  and the cross sectional area along the  
28 long axis is  $\pi r_p^2 + 2r_p (h_p - 2r_p)$ . Therefore, for horizontal transmembrane flow in palisade tissue,  
29

$$(S3) \quad \gamma_{m,ph} = (1 - p_p) f_c \frac{\frac{1}{2}(4\pi r_p^2 + 2\pi r_p (h_p - 2r_p))}{\pi r_p^2 + 2r_p (h_p - 2r_p)} = \frac{\pi(1 - p_p) f_c h_p}{2h_p - (4 - \pi)r_p}$$

31

32 All other cell types are modeled as rectangular boxes with zero tissue porosity, so their ratios of  
 33 projected and actual transmembrane flow areas are simply unity.

34

35 For apoplastic flow paths, the total area available for flow is approximately the product of cell  
 36 circumference, cell wall thickness and cell wall porosity, whereas the bulk area is the cell cross  
 37 sectional area divided by the complement of tissue porosity. For vertical apoplastic flow in the  
 38 palisade, this gives

39

$$(S4) \quad \gamma_{a,pv} = \frac{t_{ap} \cdot 2\pi r_p \cdot p_a}{\pi r_p^2 / (1 - p_p)} = \frac{2p_a (1 - p_p) t_{ap}}{r_p}$$

41

42 For horizontal apoplastic flow in the palisade, this gives

43

$$(S5) \quad \gamma_{a,ph} = \frac{p_a (1 - p_p) t_{ap} (2\pi r_p + 2h_p)}{\pi r_p^2 + 2r_p (h_p - 2r_p)}$$

45

46 For horizontal or vertical flow in the spongy mesophyll, the result is analogous to  $\gamma_{a,pv}$ :

47

$$(S6) \quad \gamma_{a,sv} = \gamma_{a,sh} = \frac{2p_a (1 - p_s) t_{as}}{r_s}$$

49

50 We modeled epidermal cells as rectangular boxes with square bases of width  $w_e$  and height  $h_e$ .

51 The area correction for vertical apoplastic flow into the epidermis is thus

52

$$(S7) \quad \gamma_{a,ev} = \frac{p_a 4w_e t_{ae}}{w_e^2} = \frac{4p_a t_{ae}}{w_e}$$

54

55 For horizontal flow, the result is

56

$$57 \quad (S8) \quad \gamma_{a,eh} = \frac{p_a(2w_e + 2h_e)t_{ae}}{w_e h_e} = 2p_a t_{ae} \left( \frac{1}{h_e} + \frac{1}{w_e} \right)$$

58

59 We modeled bundle sheath and BSE cells as cubes with width  $w_b$  and  $w_x$ , respectively, which  
60 gives results analogous to  $\gamma_{a,ev}$ :

61

$$62 \quad (S9) \quad \gamma_{a,xv} = \gamma_{a,xh} = \frac{4p_a t_{ax}}{w_x}, \text{ and}$$

63

$$64 \quad (S10) \quad \gamma_{a,b} = \frac{4p_a t_{ab}}{w_b}.$$

65

66 Finally, for gas flow, the area correction is simply the tissue porosity:  $\gamma_{g,p} = p_p$  and  $\gamma_{g,s} = p_s$  for  
67 palisade and spongy mesophyll, and zero for all other tissues.

68

69

---

70 *Flow pathlengths per unit bulk pathlength,  $\beta$*

71 For apoplastic flow in spongy mesophyll and horizontal apoplastic flow in palisade mesophyll,  
72 the direct route across a cell is twice its radius, whereas the minimum apoplastic route is half of  
73 the cell circumference, or  $\pi$  times its radius, corrected for mesophyll connectivity ( $f_c$ ). The terms  
74 for radius cancel out, giving

75

$$76 \quad (S11) \quad \beta_{a,sh} = \beta_{a,sv} = \beta_{a,ph} = \frac{1}{2}(1 - f_c)\pi$$

77

78 For vertical apoplastic flow in palisade mesophyll, the direct and apoplastic routes are both  
79 longer than for horizontal flow by the cell height  $h_p$  minus twice the radius, which gives

80

81 (S12) 
$$\beta_{a,pv} = \frac{(1-f_c)\pi r_p + (h_p - 2r_p)}{2r_p + (h_p - 2r_p)} = 1 + ((1-f_c)\pi - 2)r_p/h_p$$

82

83 The actual and direct flow paths are equivalent for all other tissues and modes of flow, giving  $\beta$   
84 = 1.

85

86

---

87 *Grid areas (a) and pathlengths (l)*

88 The grid is a set of 744 tissue bands delineated by 25 planes parallel to the epidermis, and 31  
89 concentric cylinders centered on a vertical axis located at the center of the areole. The upper- and  
90 lower-most planes coincide with the upper and lower leaf surfaces, respectively, thus defining 24  
91 "rows" of tissue bands (indicated below with subscripted indices  $i$ ). The outermost cylinder  
92 coincides with the lateral midpoint of the nearest minor vein, thus defining 31 "columns" of  
93 tissue bands (indicated below with indices  $j$ ).

94

95 With three exceptions, the vertical and radial thicknesses of these tissue bands are identical to  
96 one another. Two of these exceptions are the uppermost and lowermost rows ( $i = 1$  and 31,  
97 respectively), whose thicknesses are defined by the measured upper and lower epidermis  
98 thicknesses, respectively. All other rows are defined as 1/29th of the remaining leaf thickness  
99 (equal to the sum of measured palisade and spongy mesophyll tissue thicknesses,  $t_p$  and  $t_s$ ). The  
100 third exception, which applies only in heterobaric species (those possessing bundle sheath  
101 extensions) is the outermost column ( $j = 1$ ), whose thickness is defined as one-half of the  
102 measured bundle sheath extension width. In these species, the widths of all other tissue columns  
103 are equal to 1/23rd of the difference between areole radius ( $r_{\text{areole}}$ ) and BSE half-width ( $w_{x,\text{tot}}/2$ ).  
104 In homobaric species (which lack bundle sheath extensions), all columns have the same width,  
105 which is 1/24th of the areole radius. These three exceptions ensure that the volumes, horizontal  
106 areas and flow pathlengths involving the epidermis and/or BSEs are appropriate to the actual  
107 tissue dimensions. (Further corrections are required to accommodate the modeled geometry of  
108 the bundle sheath; these are described in the next section.)

109

110 The area for horizontal flow between tissue bands  $j$  and  $j+1$  with thickness  $t_i$  ( $t_i = t_e$  for epidermal  
 111 rows or  $(t_p + t_s)/29$  otherwise) is equal to the product of  $t_i$  and the circumference of the outer  
 112 cylinder bounding the band at  $j+1$ . For heterobaric species, this area is

$$113$$

$$114 \text{ (S13) } a_{h,i}[j; j+1] = t_i \cdot 2\pi \left( r_{\text{areole}} - \frac{1}{2} w_{x,\text{tot}} \right) (1 - (j-1)/23)$$

115  
 116 and for homobaric species, this area is

$$117$$

$$118 \text{ (S14) } a_{h,i}[j; j+1] = t_i \cdot 2\pi r_{\text{areole}} (1 - j/24)$$

119  
 120 The area for vertical flow between bands at column  $j$  and rows  $i$  and  $i+1$  is equal to the vertical  
 121 projected area of the band at column  $j$ . This equals the difference between the areas of circles  
 122 defined by the outer and inner radial boundaries of column  $j$ . For the outermost column ( $j = 1$ ) in  
 123 heterobaric species, this area is

$$124$$

$$125 \text{ (S15) } a_{v,j=1} = \pi r_{\text{areole}}^2 - \pi \left( r_{\text{areole}} - \frac{1}{2} w_{x,\text{tot}} \right)^2$$

126  
 127 For all other columns in heterobaric species, the area is

$$128$$

$$129 \text{ (S16) } a_{v,j>1} = \pi \left[ \left( r_{\text{areole}} - \frac{1}{2} w_{x,\text{tot}} \right) (1 - (j-1)/23) \right]^2 - \pi \left[ \left( r_{\text{areole}} - \frac{1}{2} w_{x,\text{tot}} \right) (1 - j/23) \right]^2$$

$$= \pi \left( r_{\text{areole}} - \frac{1}{2} w_{x,\text{tot}} \right)^2 (47 - 2j)/529$$

130  
 131 For all columns in homobaric species, the area is

$$132$$

$$133 \text{ (S17) } a_{v,j} = \pi r_{\text{areole}}^2 (49 - 2j)/576$$

134  
 135 The direct flow pathlengths between adjacent bands are computed as the distances between the  
 136 vertical and radial midpoints of those bands. Thus, the direct pathlength between the upper  
 137 epidermis ( $i = 1$ ) and the row of tissue bands directly below it ( $i = 2$ ) equals one-half of the upper

138 epidermis thickness ( $t_{eu}$ ) plus one-half of the thickness of one non-epidermis band, which as  
139 described above is 1/29th of the sum of palisade and spongy tissue thicknesses. This flow path is  
140

$$141 \quad (S18) \quad l_v [i = 1; i = 2] = \frac{1}{2} t_{eu} + \frac{1}{29} (t_p + t_s)$$

142

143 Similarly, the direct flow pathlength between rows 30 and 31 (the lower epidermis) is

144

$$145 \quad (S19) \quad l_v [i = 30; i = 31] = \frac{1}{2} t_{el} + \frac{1}{29} (t_p + t_s)$$

146

147 The direct vertical flow pathlengths between all other rows is simply

148

$$149 \quad (S20) \quad l_{v, 2 \leq i \leq 30} = \frac{1}{29} (t_p + t_s)$$

150

151 The direct horizontal flow pathlength between the outermost tissue band column ( $j = 1$ ) and the  
152 adjacent column ( $j = 2$ ) differs for heterobaric and homobaric species. For heterobaric species,  
153 the value is one-half of the bundle sheath extension half-width plus one-half of 1/23 of the  
154 remainder of the areole radius:

155

$$156 \quad (S21) \quad l_h [j = 1; j = 2] = \frac{1}{4} w_{x,tot} + \frac{1}{46} (r_{areole} - \frac{1}{2} w_{x,tot})$$

157

158 For connections between all other adjacent columns in heterobaric species, the value is

159

$$160 \quad (S22) \quad l_{h, j \geq 2} = \frac{1}{23} (r_{areole} - \frac{1}{2} w_{x,tot})$$

161

162 For homobaric species, the direct horizontal flow pathlength between any two adjacent columns  
163 is simply 1/24th of the areole radius:

164

$$165 \quad (S23) \quad l_h = r_{areole} / 24$$

166

167

---

168 *Estimating the number of grid rows for each tissue type*

169 We estimated the number of grid rows for different tissue types based on measured tissue  
170 thicknesses, as follows. The number of bundle sheath rows ( $n_{bs}$ ) was the greater of 1 and the  
171 quantity  $29 \cdot h_{bs} / (t_p + t_s)$ , rounded to the nearest whole number. This recognises that the palisade  
172 and spongy mesophyll tissue thicknesses combined ( $t_p + t_s$ ) occupy 29 grid rows in total. The  
173 number of rows between the BS and the upper epidermis,  $n_{xu}$ , was computed as  $(29 - n_{bs}) \cdot h_{xu} / (h_{xu}$   
174  $+ h_{xl})$  (rounded to the nearest whole number), where  $h_{xu}$  and  $h_{xl}$  are the distances from the bundle  
175 sheath to the upper and lower epidermis, respectively; the number of rows between the BS and  
176 the lower epidermis,  $n_{xl}$ , was then  $29 - n_{bs} - n_{xu}$ . The number of palisade rows ( $n_p$ ) was  $29 \cdot t_p / (t_p +$   
177  $t_s)$ , rounded to the nearest whole number, and the number of spongy mesophyll rows ( $n_s$ ) was  $29 -$   
178  $n_p$ .

179

180

---

181 *Corrections to account for bundle sheath geometry*

182 We modeled the bundle sheath as the space between the radial faces of two torus-like objects:  
183 one is actually an elliptic torus, and the other is a similar solid of revolution that is nested within  
184 the elliptic torus but has dimensions such that the distance from its surface to that of the elliptic  
185 torus is everywhere identical. The elliptic torus represents the outer face of the BS (the face  
186 farther from the xylem), the smaller (inner) torus-like object is the inner face, and the constant  
187 distance between the two faces represents the constant thickness of the BS itself. The outer face  
188 contacts mesophyll and BSE tissues. However, because the BS is represented in the grid as  
189 simply a stack of cylindrical tissue bands in the outermost column of tissue bands, the total area  
190 of the BS is not accurately represented by the grid areas computed as described in the preceding  
191 section. We therefore corrected the values for BS bulk conductivity applied to the grid in such a  
192 way that the total hydraulic conductance out of the BS accurately reflects the toroidal model  
193 described above. In this section, we describe how the relevant areas and corrections were  
194 calculated.

195

196 The area of the inner and outer faces of the BS can be computed using Pappus' Centroid  
197 Theorem, which states that the surface area of a surface of revolution created by revolving a

198 curve about an axis is equal to the product of the arc length of the curve and the distance  
 199 travelled during the revolution by the curve's centroid (the point coinciding with the geometric  
 200 average of all points in the curve). To compute these values, we therefore require the appropriate  
 201 arc lengths, centroids and radii of revolution. The major radius of both tori is equal to the areole  
 202 radius. The vertical radius of the ellipse (the "tube") for the outer torus is one-half of the  
 203 measured height of the bundle sheath ( $h_{bs}$ ), and the horizontal radius of that ellipse is computed  
 204 from  $h_{bs}$  and the bundle sheath perimeter ( $p_{bs}$ ) as  $p_{bs}/\pi - h_{bs}/2$ . The two radii of the ellipse for the  
 205 inner torus are smaller than the analogous values for the outer torus by an amount equal to the  
 206 measured bundle sheath cell thickness ( $t_{bs}$ ).

207  
 208 The arc length for the outer face is thus simply  $p_{bs}/2$ , and the arc length for the inner face is  
 209  $\pi(p_{bs}/\pi - h_{bs}/2 - t_{bs}) + (h_{bs}/2 - t_{bs})/2 = \pi(p_{bs}/\pi - 2 \cdot t_{bs})/2 = p_{bs}/2 - \pi \cdot t_{bs}$ . It is easily shown that the  
 210 centroid for the outer face is located at a distance  $4(p_{bs}/\pi - h_{bs}/2)/(3\pi)$  from the edge of the  
 211 areole, and the centroid for the inner face is located at a distance  $4(p_{bs}/\pi - h_{bs}/2 - t_{bs})/(3\pi)$ . The  
 212 distance travelled by these centroids during revolution is  $2\pi$  times the difference between  $r_{areole}$   
 213 and each of these values. Thus, the area of the outer face is

$$214$$

$$215 \quad (S24) \quad a_{bs,out} = \left[ \frac{p_{bs}}{2} \right] \cdot \left[ 2\pi \left( r_{areole} - \frac{4}{3\pi} \left( \frac{p_{bs}}{\pi} - \frac{h_{bs}}{2} \right) \right) \right]$$

216  
 217 and the area of the inner face is

$$218$$

$$219 \quad (S25) \quad a_{bs,in} = \left[ \frac{p_{bs}}{2} - \pi t_{bs} \right] \cdot \left[ 2\pi \left( r_{areole} - \frac{4}{3\pi} \left( \frac{p_{bs}}{\pi} - \frac{h_{bs}}{2} - t_{bs} \right) \right) \right]$$

220  
 221  
 222 The total computed grid area for contact between the BS and mesophyll in heterobaric species is  
 223  $n_{bs}$  times the horizontal projected area for contact between the outermost column and the adjacent  
 224 column, which from Eqn S13 is

225

226

$$227 \quad (S26) \quad a_{grid,bs-mes} = n_{bs} \cdot \frac{(t_p + t_s)}{29} \cdot 2\pi \left( r_{areole} - \frac{1}{2} w_{x,tot} \right)$$

228

229 For homobaric species, this area (from Eqn S14) is

230

$$231 \quad (S27) \quad a_{grid,bs-mes} = n_{bs} \cdot \frac{(t_p + t_s)}{29} \cdot 2\pi r_{areole} \left( \frac{23}{24} \right)$$

232

233 The total computed grid area for BS to BSE contact in heterobaric species is equal to twice the  
234 vertical projected area of a tissue band in the outermost column, which from Eqn S15 is

235

$$236 \quad (S28) \quad a_{grid,bs-bse} = 2 \left( \pi r_{areole}^2 - \pi \left( r_{areole} - \frac{1}{2} w_{x,tot} \right)^2 \right)$$

237

238 For homobaric species, from Eqn S17 this area is

239

$$240 \quad (S29) \quad a_{grid,bs-mes,vert} = 2\pi r_{areole}^2 \cdot 47/576$$

241

242 We assumed that the fraction of the total outer BS surface area in contact with the BSEs was  
243 equal to the BSE width divided by one-half of the BS perimeter ( $2 \cdot w_{x,tot} / p_{bs}$ ), so that the total BS-  
244 BSE surface area was  $2 \cdot w_{x,tot} \cdot a_{bs,out} / p_{bs}$ . Thus, when calculating conductances for vertical  
245 transport between BS and BSE nodes in heterobaric species, the bulk flow area computed from  
246 Eqn x was corrected by the ratio

247

$$248 \quad (S30) \quad \frac{(2w_{x,tot} / p_{bs}) a_{bs,out}}{a_{grid,bs-bse}}$$

249

250 For conductances for horizontal transport between BS and mesophyll nodes in heterobaric  
251 species, the bulk flow area was corrected by the following ratio:

252

253 (S31) 
$$\frac{(1 - 2w_{x,tot} / p_{bs})a_{bs,out}}{a_{grid,bs-bse}}$$

254

255 The analogous corrections for homobaric species are identical except that the BSE width  $w_{x,tot}$  is  
 256 replaced by twice the width of the outermost column of tissue bands in these species, or  
 257  $2 \cdot r_{areole} / 24$ :

258

259 (S32) 
$$\frac{(r_{areole} / 6p_{bs})a_{bs,out}}{a_{grid,bs-bse}}, \text{ and}$$

260

261 (S33) 
$$\frac{(1 - r_{areole} / 6p_{bs})a_{bs,out}}{a_{grid,bs-bse}}.$$

262

263

---

264 *Computing volumes for each node*

265 To compute volumes for each node, we consider each node to represent a three-dimensional  
 266 annulus within the areole, bounded horizontally by cylinders and vertically by planes. For  
 267 mesophyll nodes, the cylinders are chosen to bisect the lines connecting each adjacent node  
 268 horizontally, and the planes are chosen to bisect the lines connecting each adjacent node  
 269 vertically. For the upper and lower rows of nodes, which represent epidermis, we used measured  
 270 upper and lower epidermis thicknesses ( $t_{eu}$  and  $t_{el}$ ) to compute volumes. For BSE nodes, we used  
 271 the measured BSE half-width ( $w_{x,tot}/2$ ) to compute volumes. The calculations of hydraulic  
 272 conductances presented in this study did not require computation of bundle sheath node volumes.

273

274

---

275 *Example of spurious differences in BS and outside-BS hydraulic conductances arising from*  
 276 *defining outside-xylem hydraulic conductance in terms of the average water potential of the*  
 277 *entire symplast*

278 In experimental studies,  $K_{ox}$  is defined in terms of leaf water potential, which equals the volume-  
 279 weighted average water potential of the entire outside-xylem compartment ( $\psi_{ox}$ ), provided that  
 280 negligible water leaves the xylem during equilibration after excision. Thus,

281

282 (S34)  $K_{ox} = E/|\psi_{ox}|$ .

283

284 In this study, we sought to partition  $K_{ox}$  into two serial pathways: the BS (with conductance  $K_b$ )  
285 and the outside-BS compartment (with conductance  $K_{ob}$ ), such that

286

287 (S35)  $\frac{1}{K_{ox}} = \frac{1}{K_b} + \frac{1}{K_{ob}}$ .

288

289 where  $K_b$  is calculated from the water potential drawdown across the BS, or  $\delta\psi_{bn}$  (the drawdown  
290 to grid nodes immediately adjacent to, or neighboring, BS nodes; hence the subscript  $bn$ ):

291

292 (S36)  $K_b = E/\delta\psi_{bn}$ .

293

294 Combining S34-S36 gives  $K_{ob}$  as

295

296 (S37)  $K_{ob} = E/(|\psi_{ox}| - \delta\psi_{bn})$ .

297

298 The value of  $K_{ob}$  given by Eqn S37 is not uniquely defined by outside-BS water transport  
299 properties, however. Imagine two leaves that are identical in every respect except for the value of  
300  $K_b$ ; specifically, suppose leaf A has  $K_b$  twice as large as leaf B. The computed values of  $K_{ob}$  will  
301 differ for these two leaves, as demonstrated in the example shown in the table below, and the  
302 difference will depend on the volume fractions of the BS and outside-BS compartments. This  
303 spurious difference in calculated  $K_{ob}$  can be traced to the fact that  $K_{ob}$  is defined in terms of a  
304 water potential ( $\psi_{ox}$ ) that includes some tissues (the BS) upstream of the tissues whose transport  
305 properties are meant to be characterised by  $K_{ob}$ . In the example below, this leads to a 63%  
306 difference in  $K_{ob}$  between the two leaves, even though they have identical outside-BS transport  
307 properties.

308

309  
310

| parameter                                                                                                                     | leaf A                                              | leaf B |
|-------------------------------------------------------------------------------------------------------------------------------|-----------------------------------------------------|--------|
| fraction of OX volume that is in BS ( $f_b$ )                                                                                 | 0.1                                                 |        |
| fraction of OX volume that is distal to BS ( $f_{ob}$ )                                                                       | 0.9                                                 |        |
| transpiration rate ( $E$ )                                                                                                    | 10                                                  |        |
| water potential drawdown from outer edge of BS to site of average water potential of outside-BS tissues ( $\delta\psi_{ob}$ ) | 0.4                                                 |        |
| BS hydraulic conductance ( $K_b$ )                                                                                            | 50                                                  | 25     |
| water potential at outer edge of BS ( $\psi_{bn}$ )                                                                           | $-E/K_b = 0.2$                                      | 0.4    |
| water potential of BS ( $\psi_b$ )                                                                                            | $\psi_{bn}/2 = -0.1$                                | -0.2   |
|                                                                                                                               |                                                     |        |
| average water potential of outside-BS tissues ( $\psi_{ob}$ )                                                                 | $\psi_{bn} - \delta\psi_{ob} = -0.5$                | -0.6   |
| outside-xylem water potential ( $\psi_{ox}$ )                                                                                 | $f_b \cdot \psi_b + f_{ob} \cdot \psi_{ob} = -0.46$ | -0.56  |
| outside-xylem hydraulic conductance ( $K_{ox}$ )                                                                              | $E/ \psi_{ox}  = 21.74$                             | 17.86  |
| outside-BS hydraulic conductance ( $K_{ob}$ )                                                                                 | $1/(1/K_{ox} - 1/K_b) = 38.46$                      | 62.54  |
| % spurious difference in $K_{ob}$                                                                                             | 63%                                                 |        |

311

312 We addressed this issue by defining  $K_{ox}$  in terms of the volume-weighted water potential  
313 drawdown to all tissues outside the BS ( $\delta\psi_{ob}$ ; Eqn 10 in the main text).

314

315

316 **Table S1.** Flow areas per unit bulk area ( $\gamma$ ) used to calculate bulk conductivities from intrinsic  
317 conductivities.

318

| tissue                    | flow direction | symbol(s)       | formula                                                                  |
|---------------------------|----------------|-----------------|--------------------------------------------------------------------------|
| <i>apoplastic flow</i>    |                |                 |                                                                          |
| palisade mesophyll        | vertical       | $\gamma_{a,pv}$ | $2p_a(1-p_p)t_{ap}/r_p$                                                  |
| palisade mesophyll        | horizontal     | $\gamma_{a,ph}$ | $\frac{p_a(1-p_p)t_{ap}(2\pi r_p + 2h_p)}{\pi r_p^2 + 2r_p(h_p - 2r_p)}$ |
| spongy mesophyll          | both           | $\gamma_{a,s}$  | $2p_a(1-p_s)t_{as}/r_s$                                                  |
| epidermis                 | vertical       | $\gamma_{a,ev}$ | $4p_a t_{ae}/w_e$                                                        |
| epidermis                 | horizontal     | $\gamma_{a,eh}$ | $2p_a t_{ae}(h_e^{-1} + w_e^{-1})$                                       |
| bundle sheath extensions  | both           | $\gamma_{a,x}$  | $4p_a t_{ax}/w_x$                                                        |
| bundle sheath             | -              | $\gamma_{a,b}$  | $4p_a t_{ab}/w_b$                                                        |
| <i>transmembrane flow</i> |                |                 |                                                                          |
| palisade mesophyll        | vertical       | $\gamma_{m,pv}$ | $2(1-p_p)f_c$                                                            |
| palisade mesophyll        | horizontal     | $\gamma_{m,ph}$ | $\frac{\pi(1-p_p)f_c h_p}{2h_p - (4-\pi)r_p}$                            |
| spongy mesophyll          | both           | $\gamma_{m,s}$  | $2(1-p_s)f_c$                                                            |
| other                     | both           | $\gamma_m$      | 1                                                                        |
| <i>gas phase flow</i>     |                |                 |                                                                          |
| palisade mesophyll        | both           | $\gamma_{g,p}$  | $p_p$                                                                    |
| spongy mesophyll          | both           | $\gamma_{g,s}$  | $p_s$                                                                    |
| other                     | both           | $\gamma_g$      | 1                                                                        |

319

320

321 **Table S2.** Flow pathlengths per unit direct pathlength ( $\beta$ ) used to calculate bulk conductivities  
 322 from intrinsic conductivities.

| <b>tissue</b>             | <b>flow direction</b> | <b>symbol(s)</b> | <b>formula</b>                  |   |
|---------------------------|-----------------------|------------------|---------------------------------|---|
| <i>apoplastic flow</i>    |                       |                  |                                 |   |
| palisade mesophyll        | vertical              | $\gamma_{a,pv}$  | $1 + ((1 - f_c)\pi - 2)r_p/h_p$ |   |
| palisade mesophyll        | horizontal            | $\gamma_{a,ph}$  | $\frac{1}{2}(1 - f_c)\pi$       |   |
| spongy mesophyll          | both                  | $\gamma_{a,s}$   | $\frac{1}{2}(1 - f_c)\pi$       |   |
| other                     | any                   | $\gamma_a$       | 1                               |   |
| <i>transmembrane flow</i> |                       |                  |                                 |   |
|                           | all                   | any              | $\gamma_m$                      | 1 |
| <i>gas phase flow</i>     |                       |                  |                                 |   |
|                           | all                   | any              | $\gamma_g$                      | 1 |

323  
 324
